# Supplementary material
Source: publisher site journal article supplement (https://www.dovepress.com/article/203259)
Supplement: Supplementary file 1 [file get_supplementary_file.php]

**Supplementary Information**

**131I-Labeled Polyethylenimine-Entrapped Gold Nanoparticles for Targeted Tumor SPECT/CT Imaging and Radionuclide Therapy**

Na Sun 1,* Lingzhou Zhao1,* Jingyi Zhu2,* Ningning Song1 Yujie Li1 Yan Xing1 Wenli Qiao1 He Huang2 Jinhua Zhao1

1 Department of Nuclear Medicine, Shanghai General Hospital, Shanghai Jiao Tong University School of Medicine, Shanghai 200080, China

2 State Key Laboratory of Material-Oriented Chemical Engineering, School of Pharmaceutical Sciences, Nanjing Tech University, Nanjing 211816, China

*These authors equally contributed to this work.

________________________________________________________

Correspondence: Jinhua Zhao, Department of Nuclear Medicine, Shanghai General Hospital, Shanghai Jiao Tong University School of Medicine, Shanghai 200080, China

Fax +86 21 3779 8352, Tel +86 21 3779 8352, Email zhaojinhua1963@126.com

He Huang, State Key Laboratory of Material-Oriented Chemical Engineering, School of Pharmaceutical Sciences, Nanjing Tech University, Nanjing 211816, China

Fax +86 25 58139942, Tel +86 25 5813 9942, huangh@njtech.edu.cn


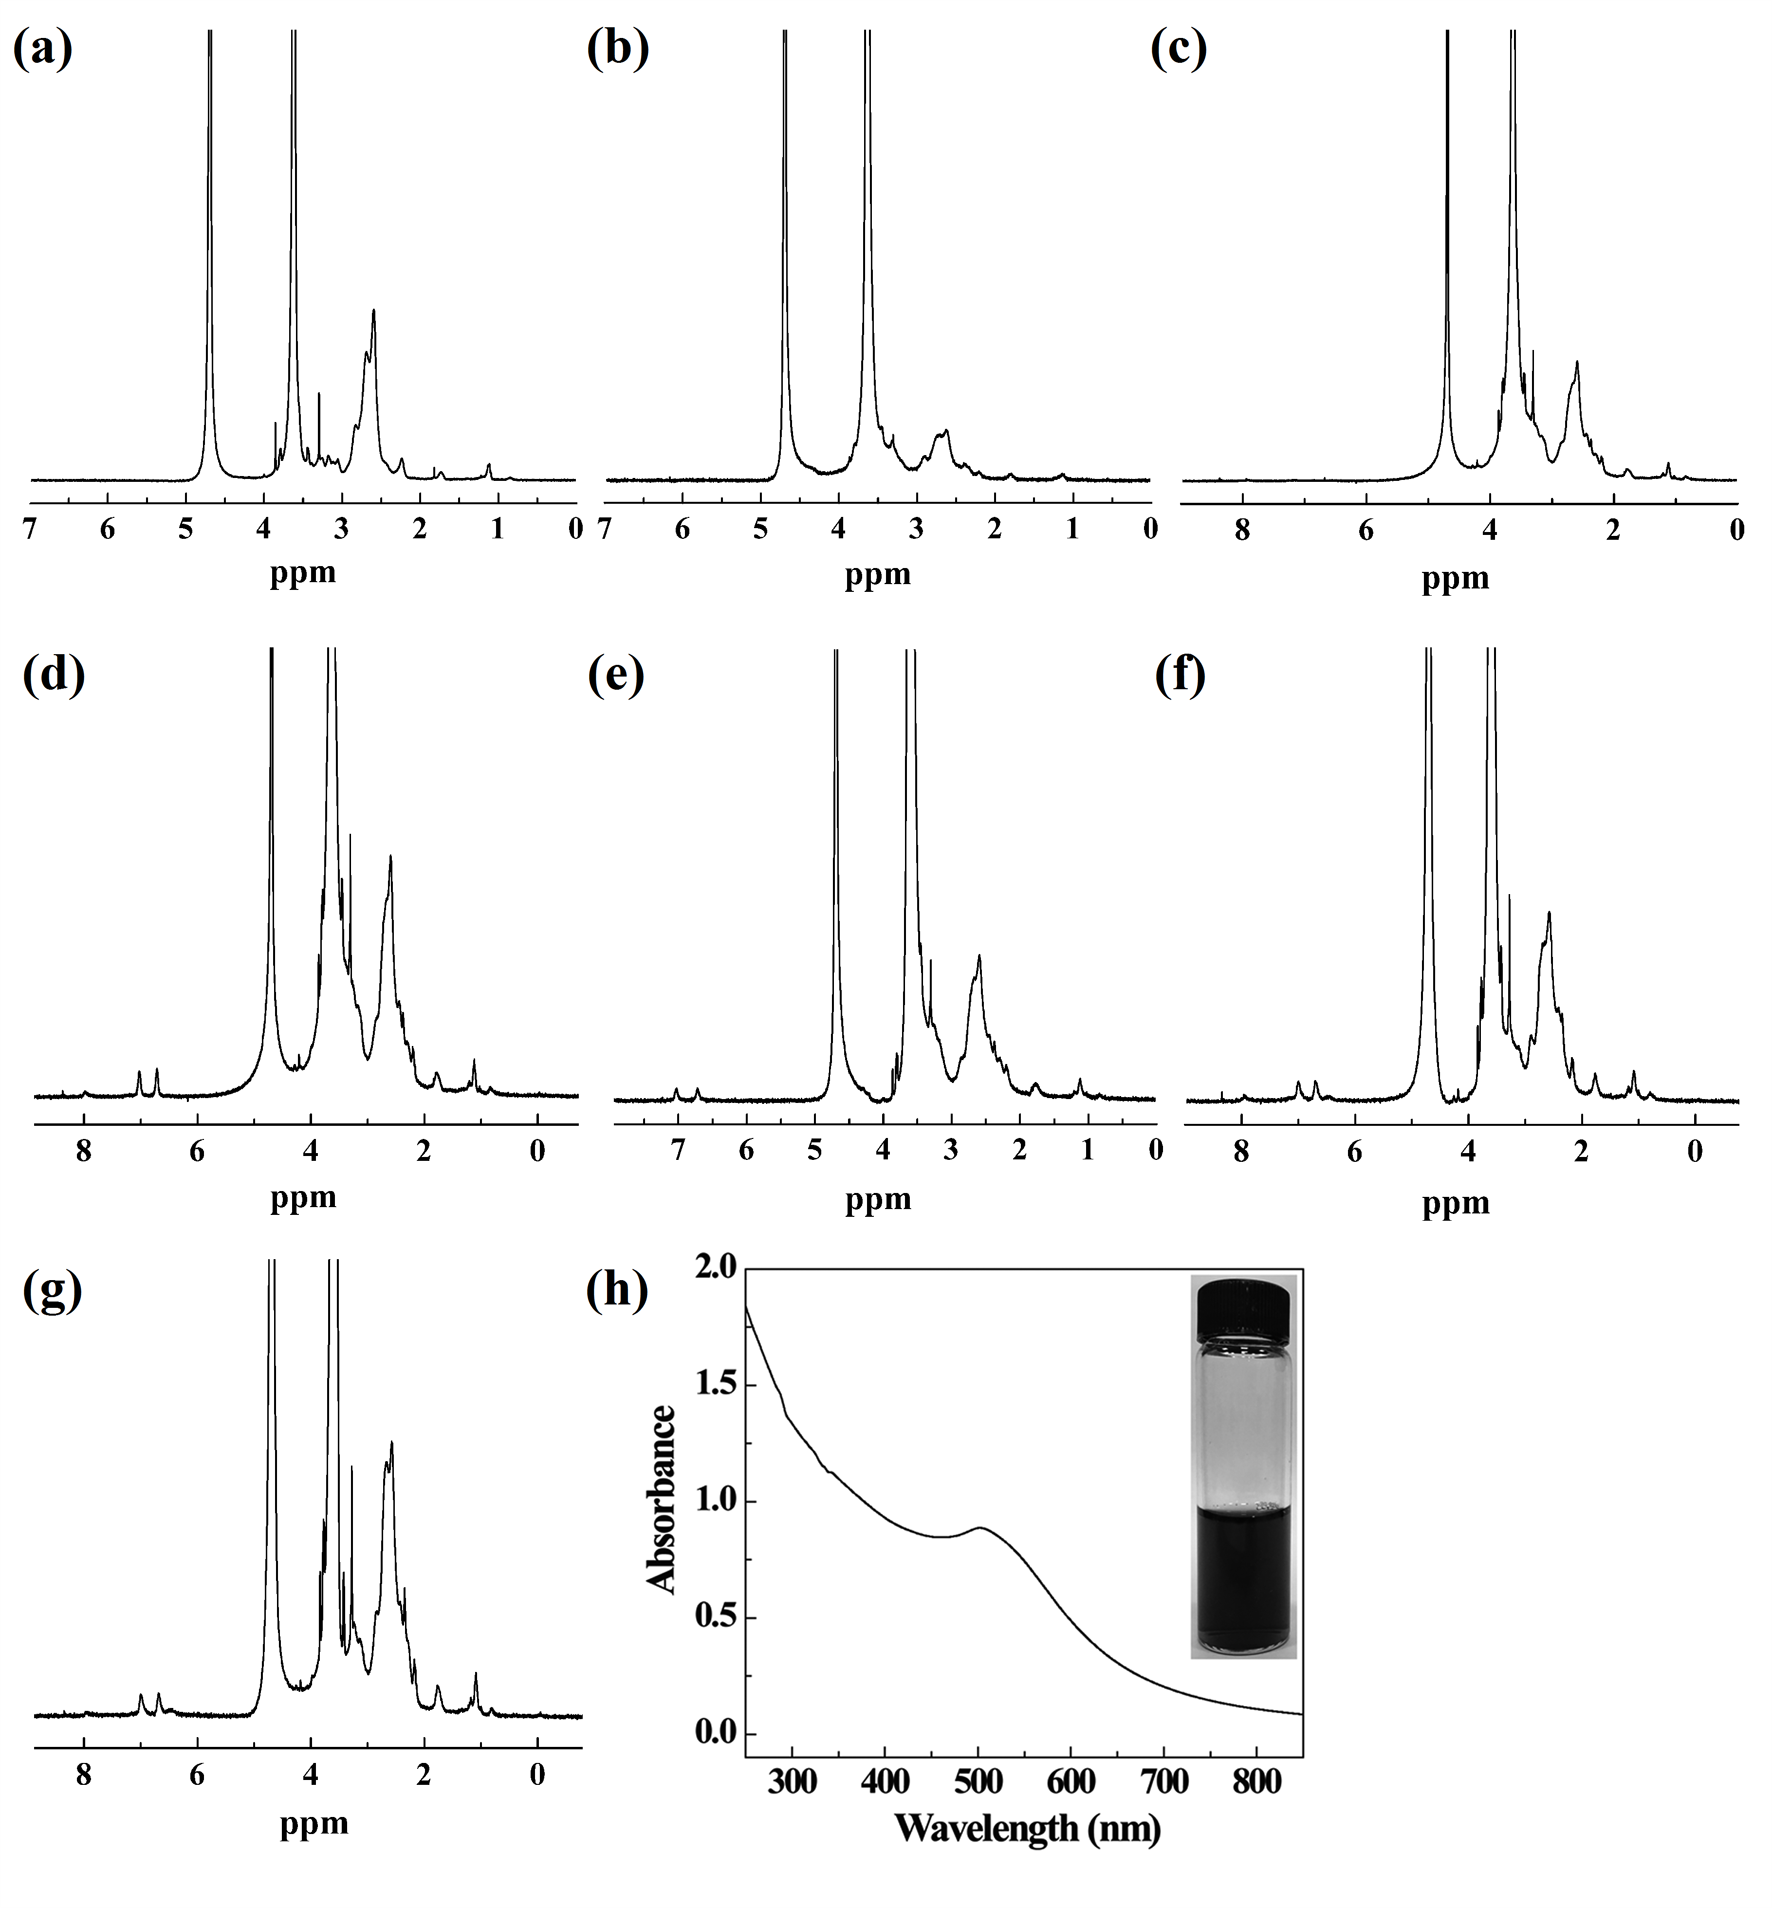


**Figure S1** Characterization of intermediate products and UV-vis spectroscopy of BmK CT-Au PENPs.

**Notes:** **1**H NMR spectra of **(a)** PEI.NH2-*m*PEG, **(b)** PEI.NH2-*m*PEG-(PEG-MAL), **(c)** PEI.NH2-*m*PEG-(PEG-BmK CT), (d) PEI.NH2-*m*PEG-(PEG-BmK CT)-HPAO, **(e)** PEI.NH2-*m*PEG-(PEG-Bu)-HPAO, **(f)** PEI.NH2-*m*PEG-(PEG-BmK CT)-HPAO-FI, and **(g)** PEI.NH2-*m*PEG-(PEG-Bu)-HPAO-FI, respectively. **(h)** UV-vis spectroscopy and photograph of BmK CT-Au PENPs dispersed in water.

**Abbreviations:** PEI, polyethylenimine; *m*PEG-COOH, methoxy-PEG-carboxymethy; MAL-PEG-SVA, maleimide-PEG-succinimidyl valerate; BmK CT, Buthus martensii Karsch chlorotoxin; FI, fluorescein isothiocyanate; HPAO, 3-(4′-hydroxyphenyl) propionic acid-OSu; BmKCT-Au PENPs-131I, 131I-labeled BmK CT modified polyethylenimine-entrapped gold nanoparticles.


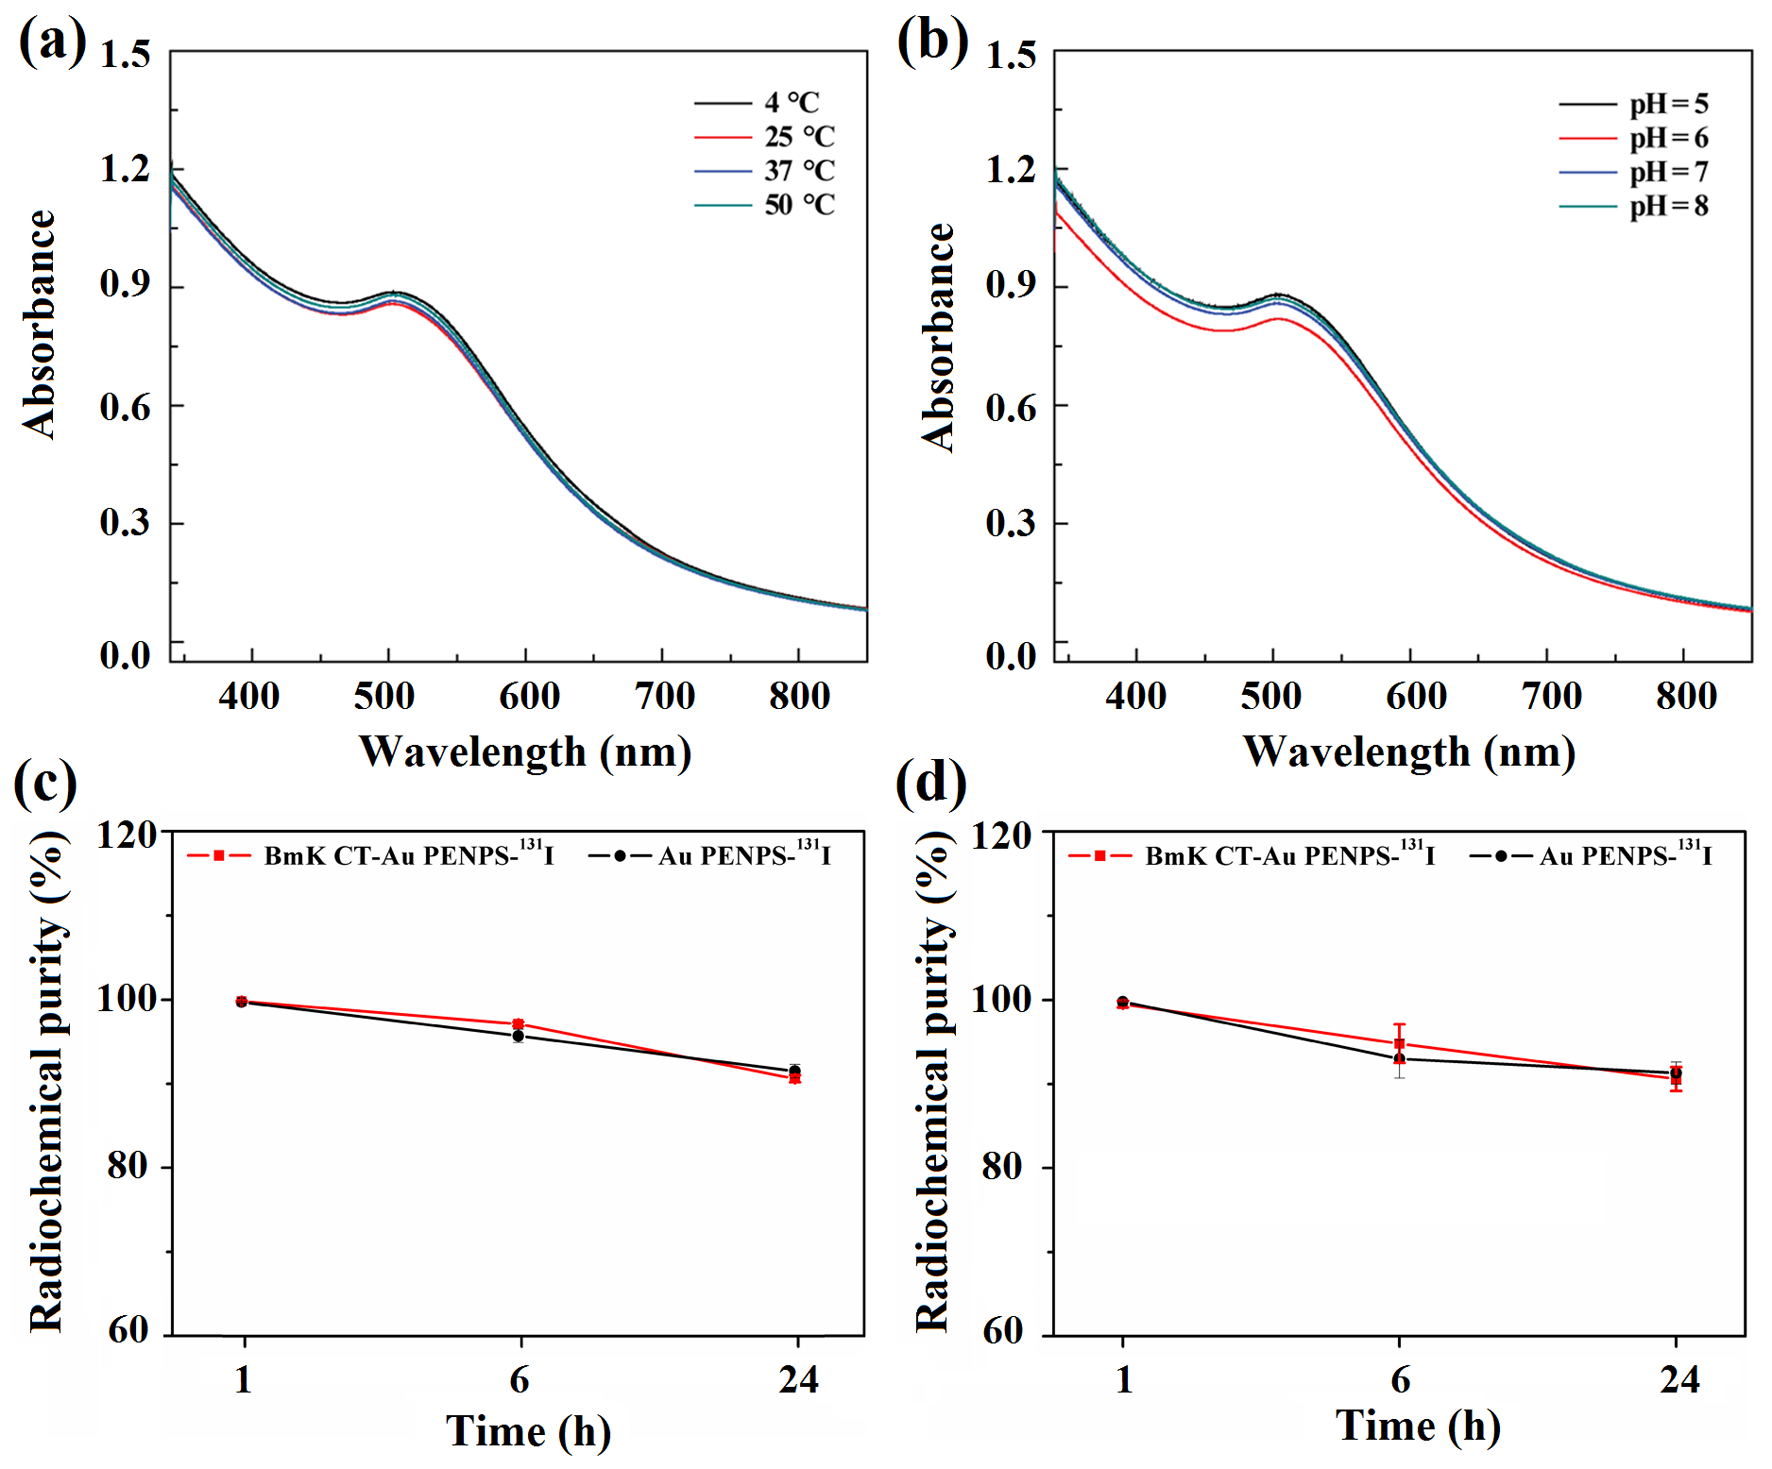


**Figure S2** Stability of the multifunctional PEI-based Au NPs before and after 131I labeling *in vitro*.

**Notes:** UV-vis spectra of the BmK CT-Au PENPs dispersed in water at different **(a)** temperature and **(b)** pH conditions. Radiochemical purities of the BmK CT-Au PENPs-131I and Au PENPs-131I exposed to **(c)** PBS at room temperature and **(d)** FBS at 37 °C for different time periods.

**Abbreviations:** PEI, Polyethylenimine; Au NPs, gold nanoparticles; BmK CT, Buthus martensii Karsch chlorotoxin; BmK CT-Au PENPs, BmK CT modified polyethylenimine-entrapped gold nanoparticles; BmK CT-Au PENPs-131I, 131I-labeled BmK CT modified polyethylenimine-entrapped gold nanoparticles; Au PENPs-131I, 131I-labeled polyethylenimine-entrapped gold nanoparticles. PBS, phosphate buffered solution; FBS, fetal bovine serum.


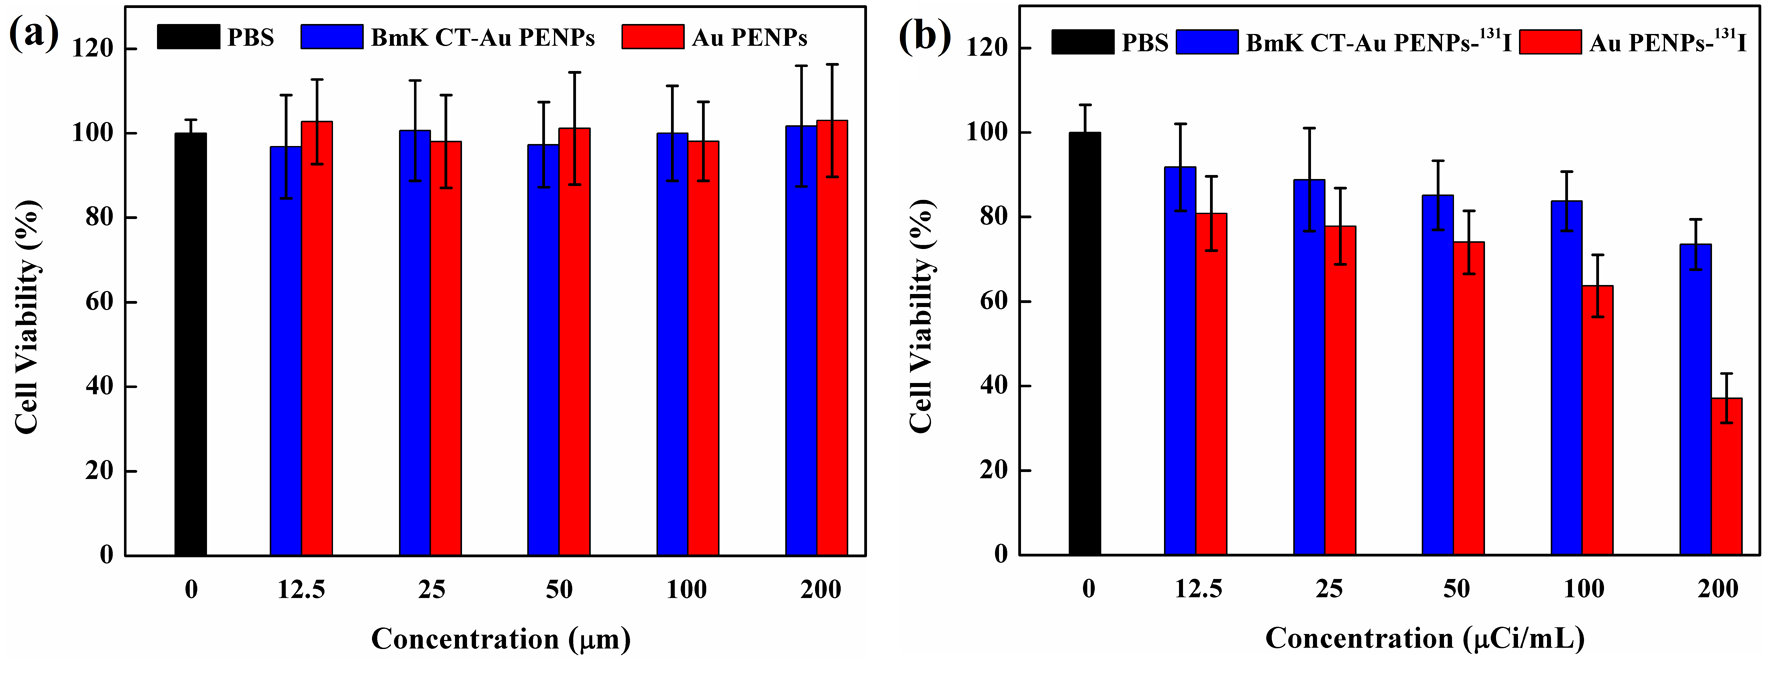


**Figure S3** *In vitro* cytotoxicity of the multifunctional PEI-based Au NPs before and after 131I labeling

**Notes: (a)** CCK-8 assay of C6 cells treated with the BmK CT-Au PENPs or Au PENPs at different Au concentrations for 24 h, respectively. **(b)** CCK-8 assay of C6 cells treated with the BmK CT-Au PENPs-131I or Au PENPs-131I at different 131I concentrations for 24 h, respectively.

**Abbreviations:** BmK CT, Buthus martensii Karsch chlorotoxin; BmK CT-Au PENPs, BmK CT modified polyethylenimine-entrapped gold nanoparticles; Au PENPs, polyethylenimine-entrapped gold nanoparticles; BmK CT-Au PENPs-131I, 131I-labeled BmK CT modified polyethylenimine-entrapped gold nanoparticles; Au PENPs-131I, 131I-labeled polyethylenimine-entrapped gold nanoparticles; PBS, phosphate buffered solution; CCK-8, Cell Counting Kit-8.


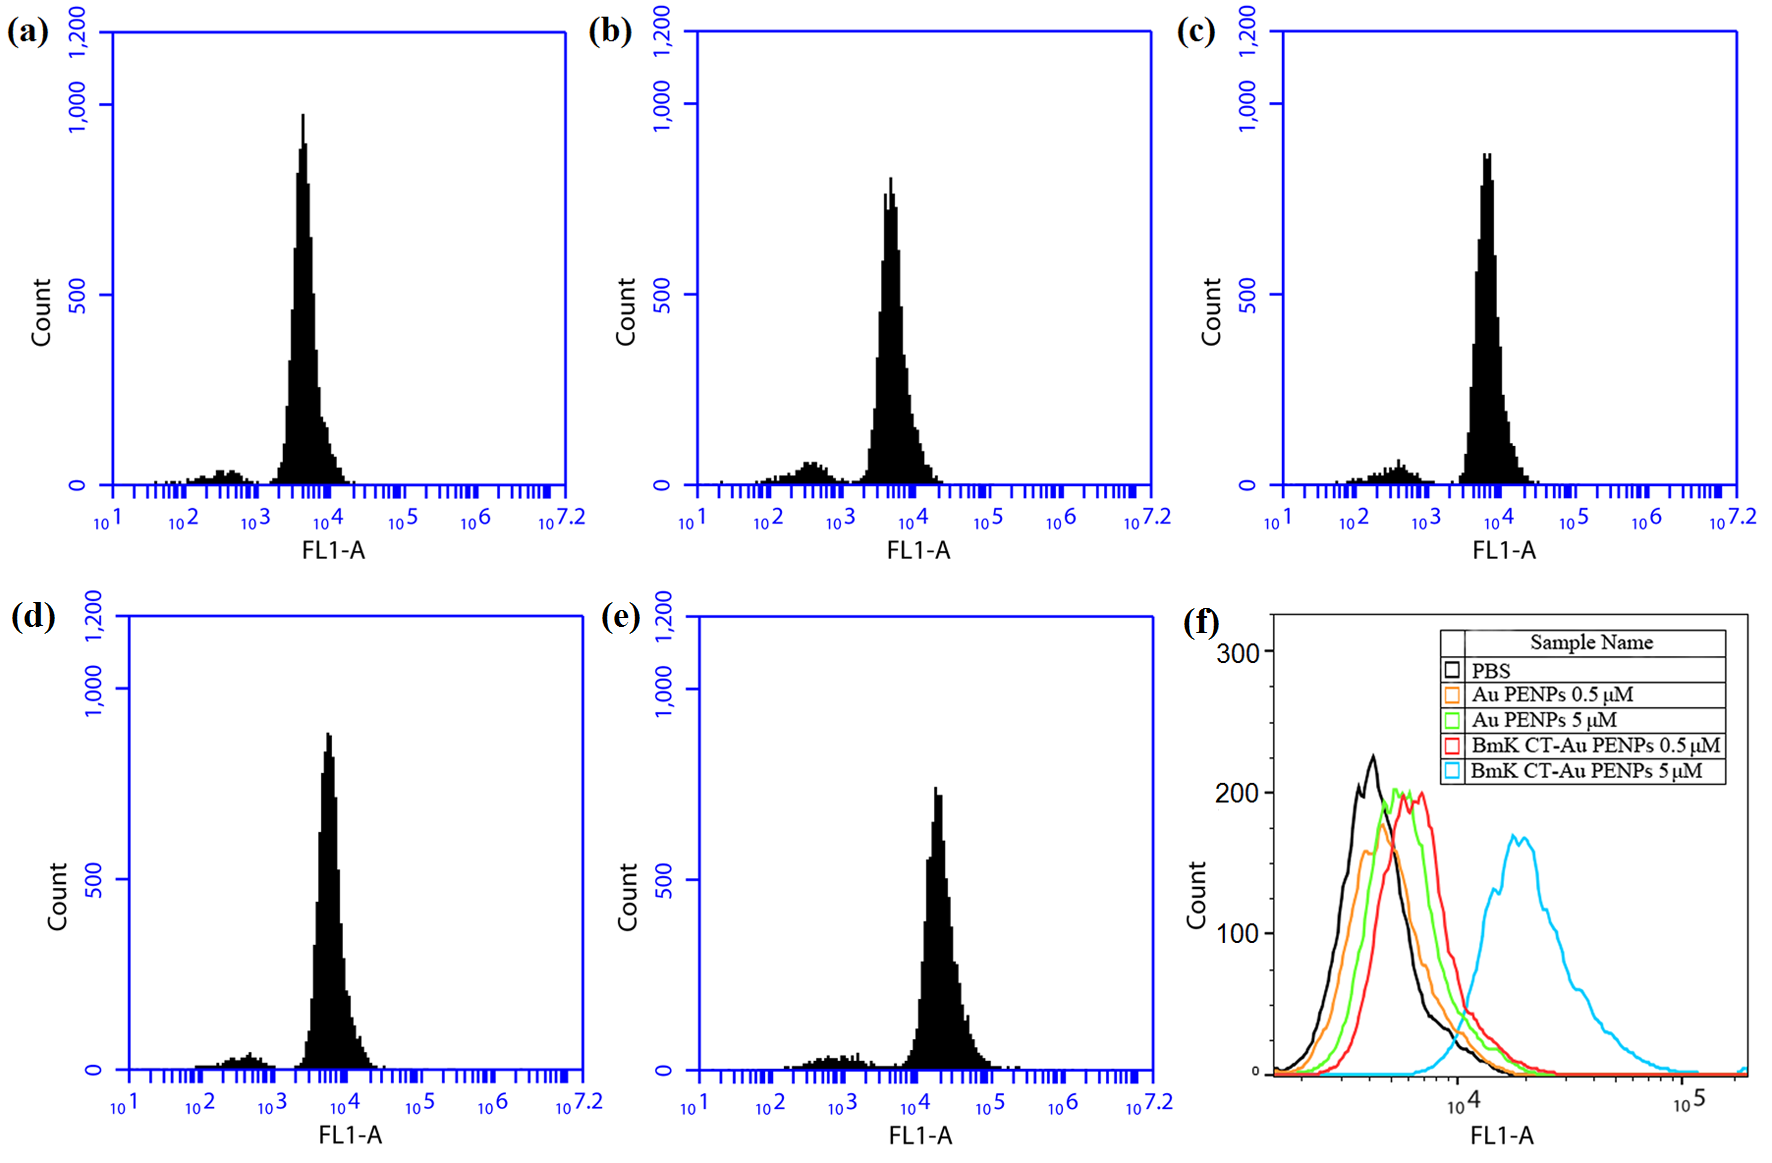


**Figure S4** Flow cytometric analysis of C6 cells incubated with **(a)** PBS, **(b)** Au PENPs (0.5 μM), **(c)** BmK CT-Au PENPs (0.5 μM), **(d)** Au PENPs (5 μM), or **(e)** BmK CT-Au PENPs (5 μM) for 4 h, respectively. Part **(f)** shows the comparison of the binding of Au PENPs and BmK CT-Au PENPs with C6 cells using PBS as a control.

**Abbreviations:** BmK CT, Buthus martensii Karsch chlorotoxin; BmK CT-Au PENPs, BmK CT modified polyethylenimine-entrapped gold nanoparticles; Au PENPs, polyethylenimine-entrapped gold nanoparticles; PBS, phosphate buffered solution.


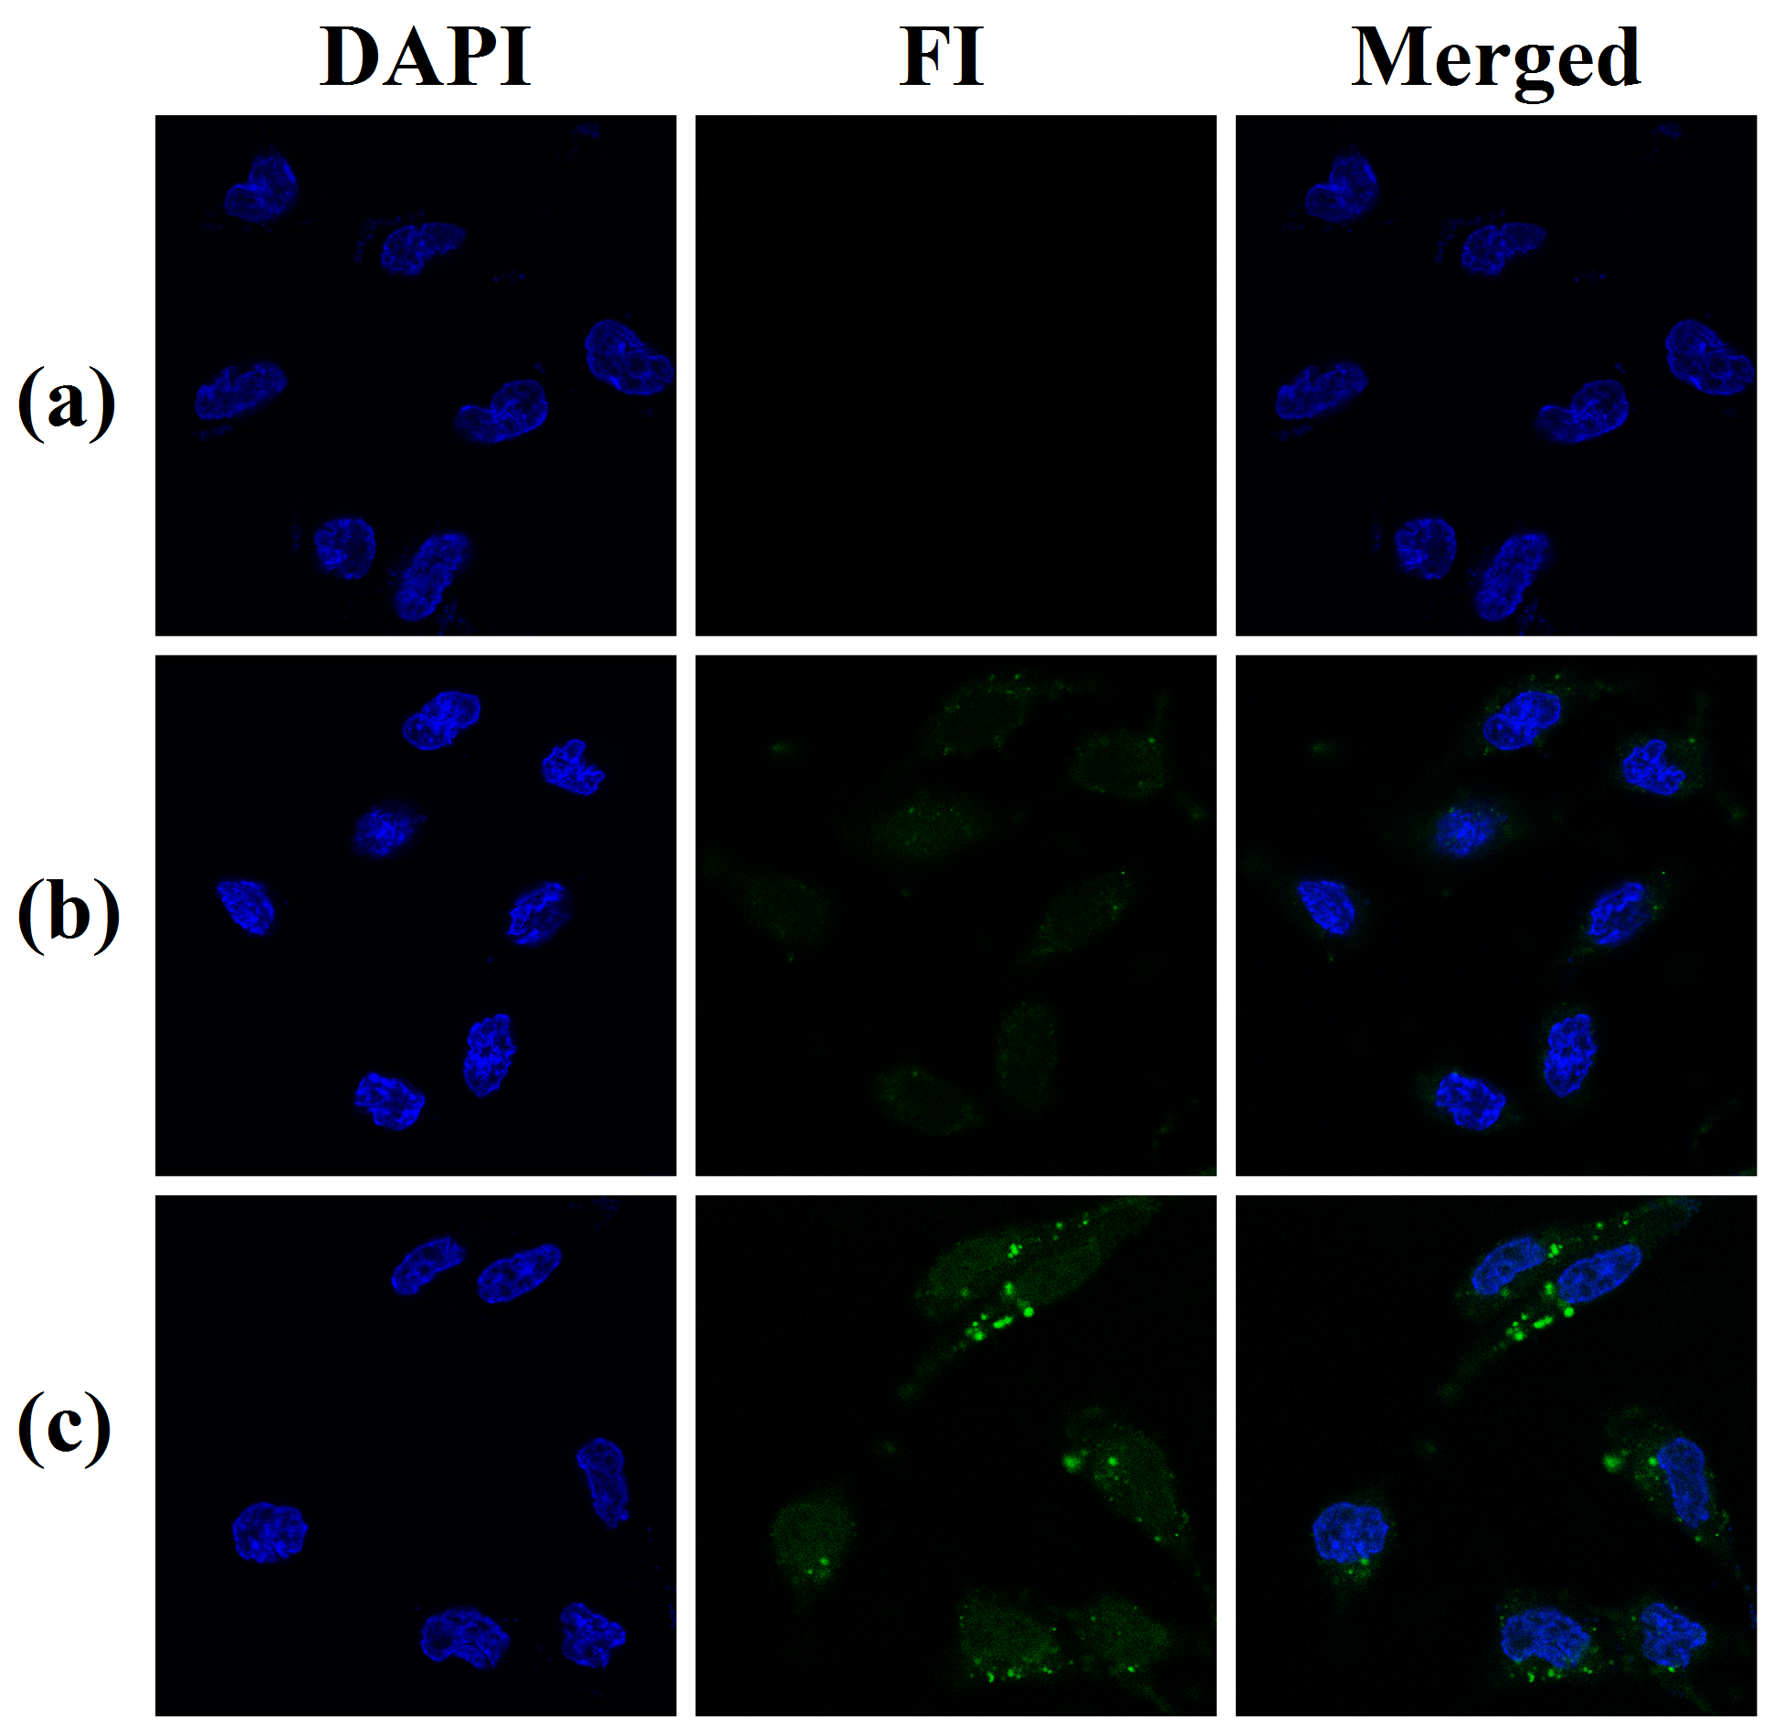


**Figure S5** Confocal microscopy images of C6 cells treated with **(a)** PBS, **(b)** Au PENPs or **(c)** BmKCT-Au PENPs with an Au concentration of 5 μM for 4 h, respectively.

**Abbreviations:** BmK CT, Buthus martensii Karsch chlorotoxin; BmK CT-Au PENPs, BmK CT modified polyethylenimine-entrapped gold nanoparticles; Au PENPs, polyethylenimine-entrapped gold nanoparticles; PBS, phosphate buffered solution.


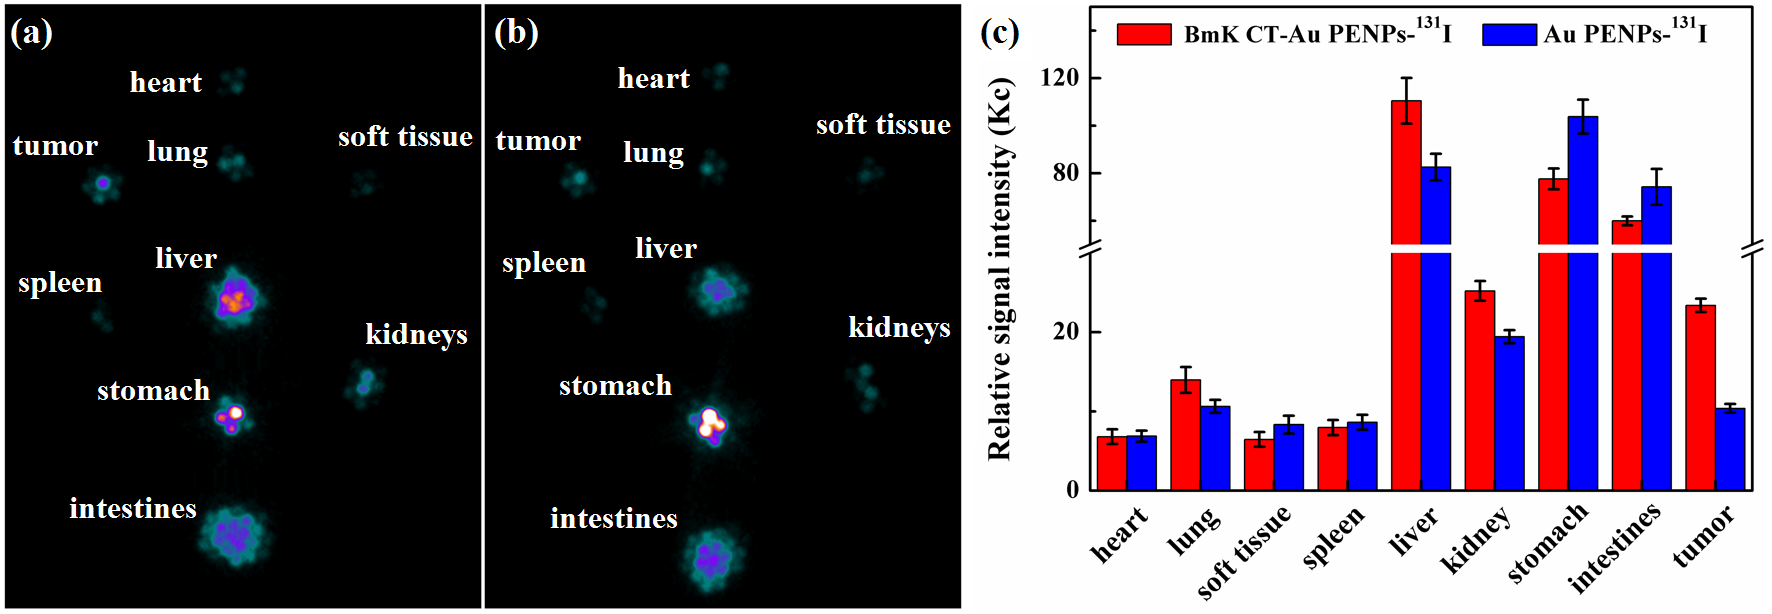


**Figure S6** The biodistribution of **(a)** BmKCT-Au PENPs-131I and **(b)** Au PENPs-131I, and **(c)** their relative signal intensities of different organs at 8 h postinjection.

**Abbreviations:** BmK CT, Buthus martensii Karsch chlorotoxin; BmK CT-Au PENPs-131I, 131I-labeled BmK CT modified polyethylenimine-entrapped gold nanoparticles; Au PENPs-131I, 131I-labeled polyethylenimine-entrapped gold nanoparticles.


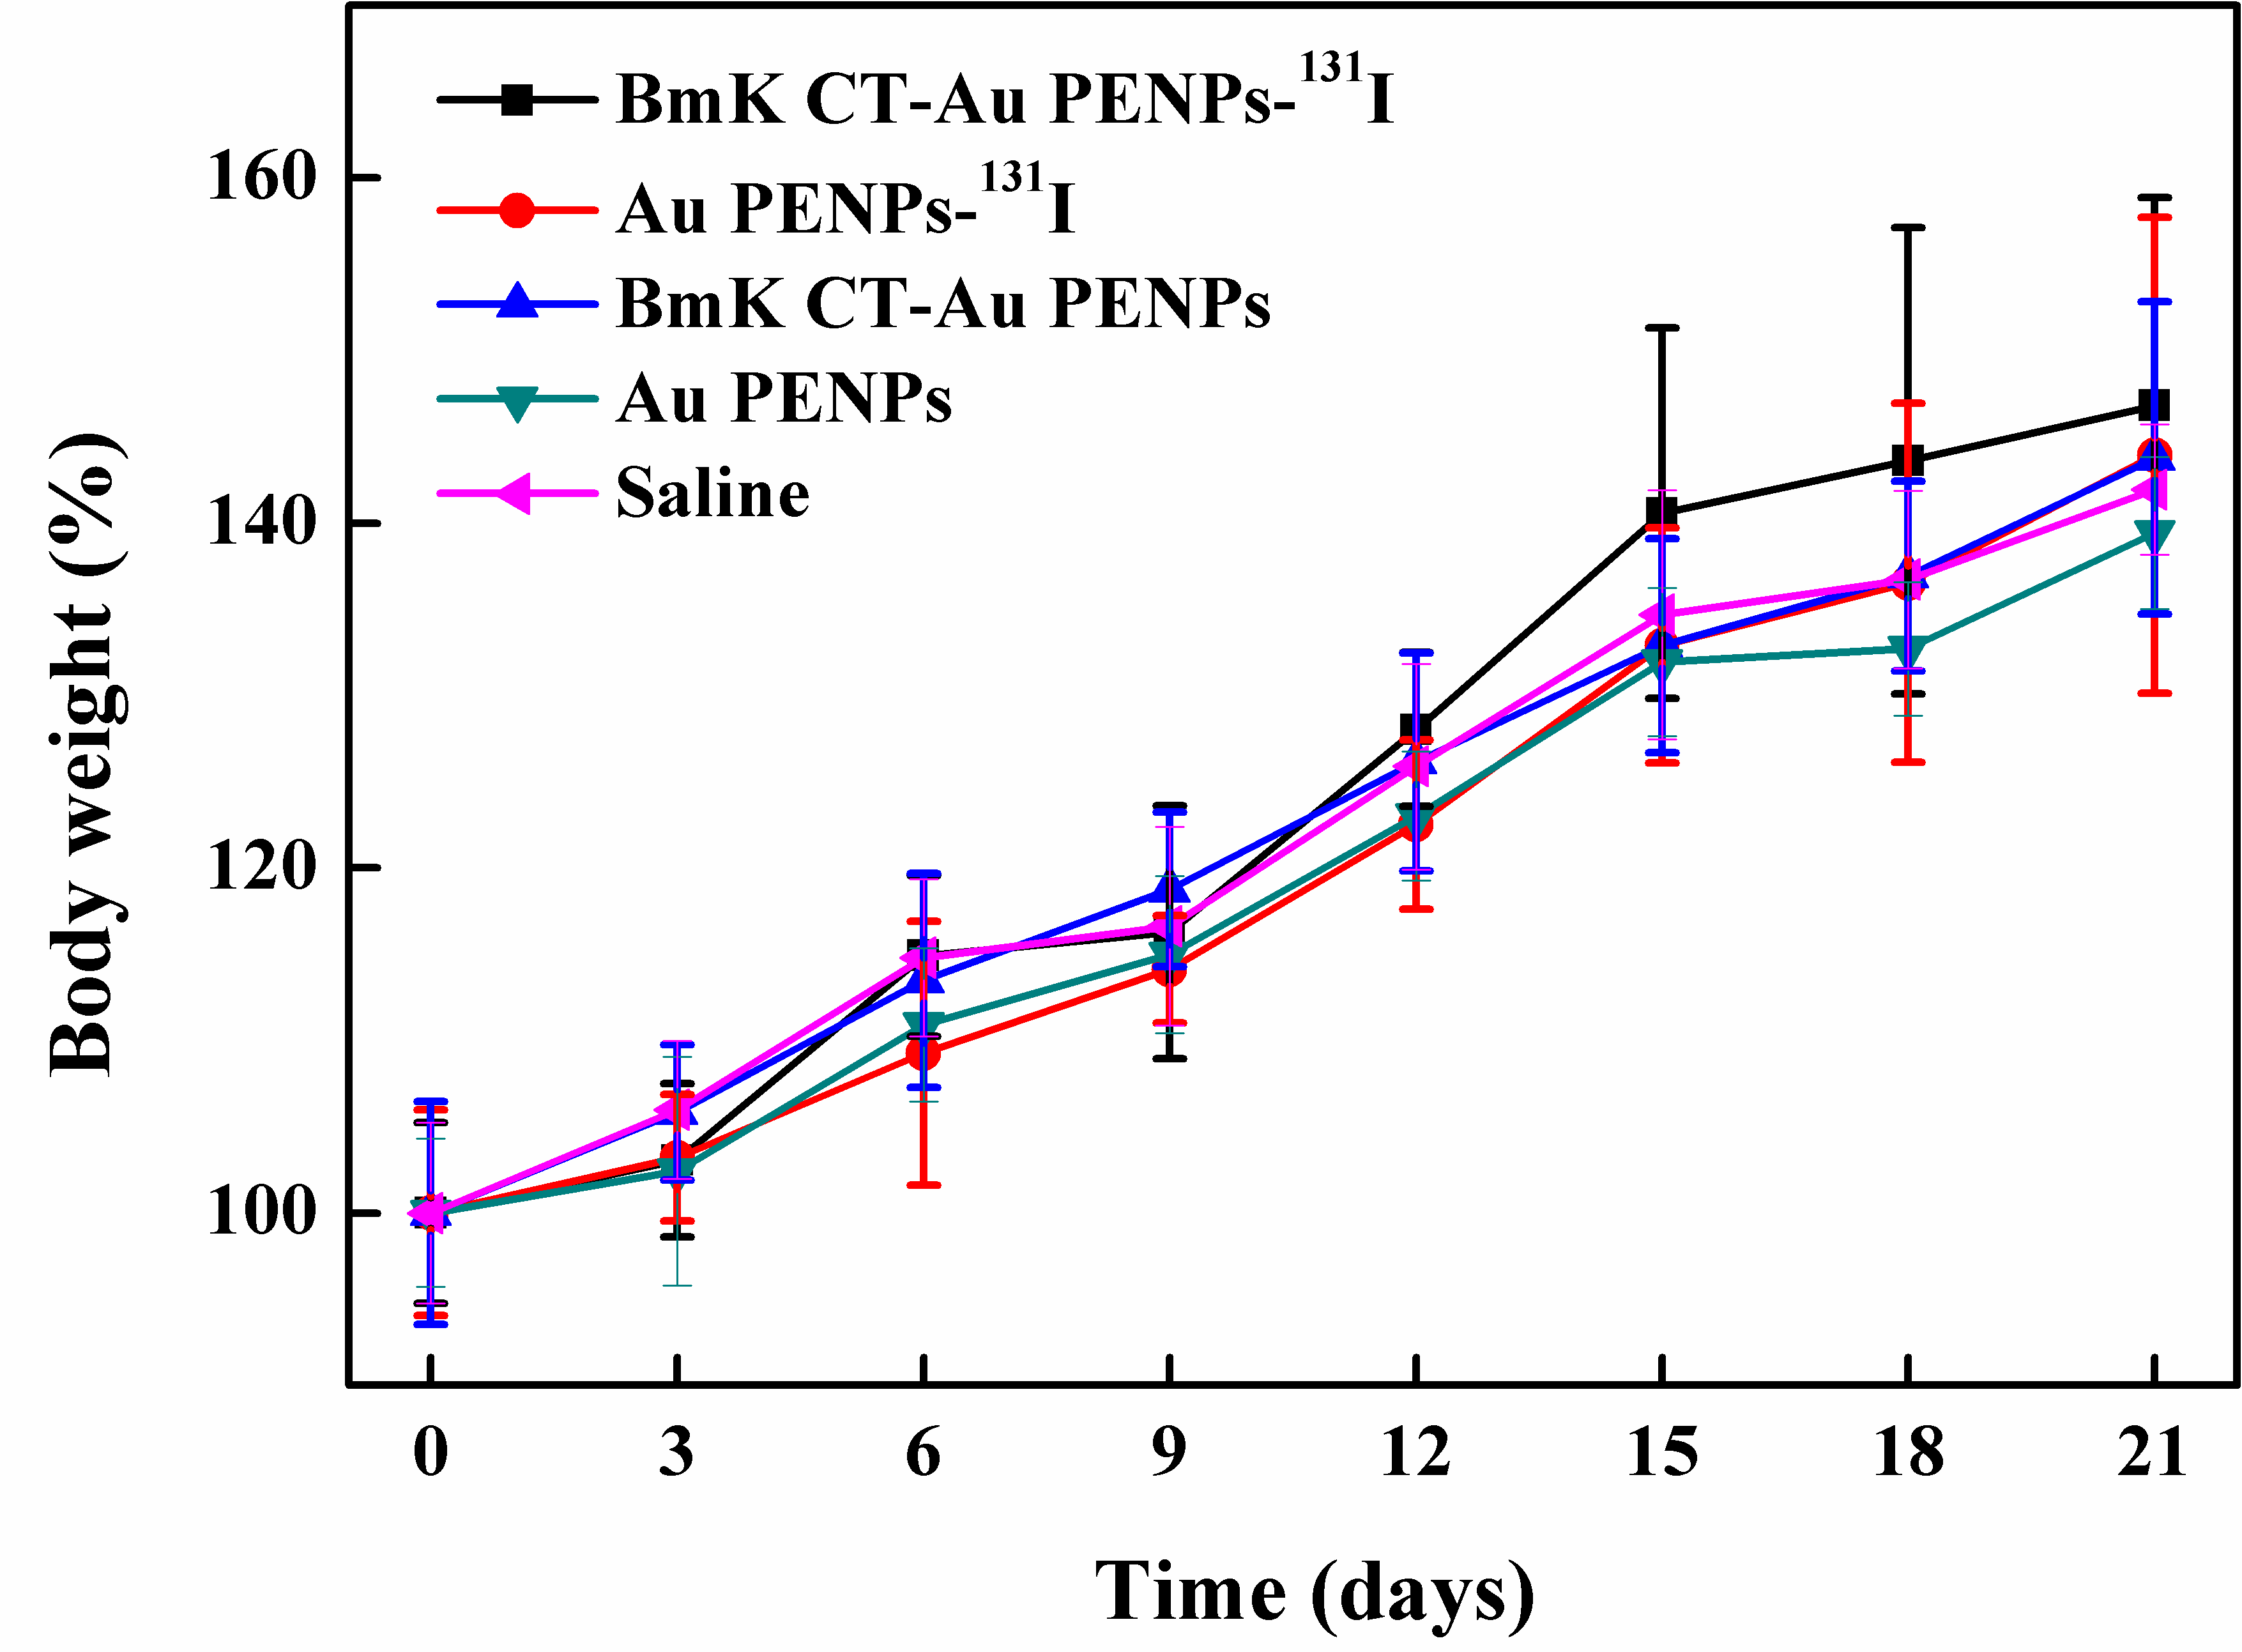


**Fig. S7** The body weight of C6 tumor-bearing mice after treatments of saline, Au PENPs, BmK CT-Au PENPs, Au PENPs-131I and BmK CT-Au PENPs-131I. The relative body weight were normalized according to their initial weights (Mean ± SD, n = 5).

**Abbreviations:** BmK CT, Buthus martensii Karsch chlorotoxin; BmK CT-Au PENPs, BmK CT modified polyethylenimine-entrapped gold nanoparticles; Au PENPs, polyethylenimine-entrapped gold nanoparticles; BmK CT-Au PENPs-131I, 131I-labeled BmK CT modified polyethylenimine-entrapped gold nanoparticles; Au PENPs-131I, 131I-labeled polyethylenimine-entrapped gold nanoparticles.
